# Supplementary material
Source: PubMed Central journal article supplement (PMC5154872)
Supplement: NIHMS826260-supplement-C9orf72_DLB.pdf [file NIHMS826260-supplement-C9orf72_DLB.pdf]

# *Analysis of C9ORF72 expansion in a large international cohort of Dementia with Lewy*

## **Bodies**

Celia Kun-Rodrigues<sup>1</sup>, Owen A. Ross<sup>2</sup>, Tatiana Orme<sup>1</sup>, Claire Shepherd<sup>3</sup>, Laura Parkkinen<sup>4</sup>, Lee Darwent<sup>1</sup>, Dena Hernandez<sup>5</sup>, Olaf Ansorge<sup>4</sup>, Lorraine N. Clark<sup>6</sup>, Lawrence S. Honig<sup>6</sup>, Karen Marder<sup>6</sup>, Afina Lemstra<sup>7</sup>, Philippe Scheltens<sup>7</sup>, Wiesje van der Flier<sup>7</sup>, Eva Louwersheimer<sup>7</sup>, Henne Holstege<sup>7</sup>, Ekaterina Rogaeva<sup>8</sup>, Peter St. George-Hyslop<sup>8</sup>, Elisabet Londos<sup>9</sup>, Henrik Zetterberg<sup>10</sup>, Imelda Barber<sup>11</sup>, Anne Braae<sup>11</sup>, Kristelle Brown<sup>11</sup>, Kevin Morgan<sup>11</sup>, Walter Maetzler<sup>12</sup>, Daniela Berg<sup>12</sup>, Claire Troakes<sup>13</sup>, Safa Al-Sarraj<sup>13</sup>, Tammaryn Lashley<sup>14</sup>, Janice Holton<sup>14</sup>, Yaroslau Compta<sup>15</sup>, Vivianna Van Deerlin<sup>16</sup>, John Q. Trojanowski<sup>16</sup>, Geidy E. Serrano<sup>17</sup>, Thomas G. Beach<sup>17</sup>, Jordi Clarimon<sup>18</sup>, Suzanne Lesage<sup>19</sup>, Douglas Galasko<sup>20</sup>, Eliezer Masliah<sup>20</sup>, Isabel Santana<sup>21</sup>, Sara Ortega-Cubero<sup>22</sup>, Pau Pastor<sup>22</sup>, Pentti J. Tienari<sup>23</sup>, Liisa Myllykangas<sup>24</sup>, Minna Oinas<sup>25</sup>, Tamas Revesz<sup>14</sup>, Andrew Lees<sup>14</sup>, Brad F. Boeve<sup>26</sup>, Ronald C. Petersen<sup>26</sup>, Tanis J. Ferman<sup>27</sup>, Valentina Escott-Price<sup>28</sup>, Neill Graff-Radford<sup>29</sup>, Nigel Cairns<sup>30</sup>, John C. Morris<sup>30</sup>, David Stone<sup>31</sup>, Stuart Pickering-Brown<sup>32</sup>, David Mann<sup>32</sup>, Dennis W. Dickson<sup>2</sup>, Glenda M. Halliday<sup>3</sup>, Andrew Singleton<sup>5</sup>, John Hardy<sup>1</sup>, Rita Guerreiro<sup>33</sup>, Jose Bras<sup>33,\*</sup>

1 - Department of Molecular Neuroscience, UCL Institute of Neurology, London, UK

2 - Department of Neuroscience, Mayo Clinic, Jacksonville, FL, USA

3 - Neuroscience Research Australia, Sydney, Australia and School of Medical Sciences, Faculty of Medicine, University of New South Wales, Sydney, Australia

4 - Nuffield Department of Clinical Neurosciences, Oxford Parkinson's Disease Centre, University of Oxford, Oxford, UK

5 - Laboratory of Neurogenetics, National Institutes on Aging, NIH, Bethesda, MD, USA

6 - Taub Institute for Alzheimer Disease and the Aging Brain and Department of Pathology and Cell Biology, Columbia University, New York, NY, USA

7 - Department of Neurology and Alzheimer Center, Neuroscience Campus Amsterdam, VU University Medical Center, Amsterdam, the Netherlands

8 - Department of Medicine, Tanz Centre for Research in Neurodegenerative Diseases, University of Toronto, Toronto, Ontario, Canada

9 - Clinical Memory Research Unit, Institution of Clinical Sciences Malmö, Lund University, Sweden

10 - Department of Molecular Neuroscience, UCL Institute of Neurology, London, UK and Clinical Neurochemistry Laboratory, Institute of Neuroscience and Physiology, Sahlgrenska Academy at the University of Gothenburg, Mölndal, Sweden

11 - Translation Cell Sciences - Human Genetics, School of Life Sciences, Queens Medical Centre, University of Nottingham, Nottingham, UK

12 - Hertie Institute for Clinical Brain Research, Department of Neurodegeneration, Center of Neurology, University of Tuebingen, Tuebingen, and Department of Neurology, Christian-Albrechts University of Kiel, Germany

13 - Department of Basic and Clinical Neuroscience and Institute of Psychiatry, Psychology and Neuroscience, King's College London, London, UK

14 - Queen Square Brain Bank, Department of Molecular Neuroscience, UCL Institute of Neurology, London, UK

15 - Queen Square Brain Bank, Department of Molecular Neuroscience, UCL Institute of Neurology, London, UK and Movement Disorders Unit, Neurology Service, Clinical Neuroscience Institute (ICN), Hospital Clínic, University of Barcelona, IDIBAPS, Barcelona, Spain

16 - Department of Pathology and Laboratory Medicine, Center for Neurodegenerative Disease Research, Perelman School of Medicine at the University of Pennsylvania, 3600 Spruce Street, Philadelphia, USA

17 - Banner Sun Health Research Institute, 10515 W Santa Fe Drive, Sun City, AZ 85351, USA

18 - Department of Neurology, IIB Sant Pau, Hospital de la Santa Creu i Sant Pau, Universitat Autònoma de Barcelona, Barcelona, Spain

19 - Sorbonne Université, Université Pierre et Marie Curie-Paris 06, Inserm, Centre National de la Recherche Scientifique, and Institute du Cerveau et de la Moelle épinière, Paris, France; Assistance Publique Hôpitaux de Paris, Hôpital de la Salpêtrière, Département de Génétique et Cytogénétique, Paris, France

20 - Department of Neurosciences, University of California, San Diego, La Jolla, CA, United States; Veterans Affairs San Diego Healthcare System, La Jolla, CA, United States

- 21 - Neurology Service, University of Coimbra Hospital, Coimbra, Portugal
- 22 - Memory Unit, Department of Neurology, University Hospital Mutua de Terrassa, University of Barcelona, Terrassa, Barcelona, Spain and Centro de Investigación Biomédica en Red Enfermedades Neurodegenerativas (CIBERNED), Madrid, Spain
- 23 - Molecular Neurology, Research Programs Unit, University of Helsinki, Department of Neurology, Helsinki University Hospital, Helsinki, Finland
- 24 - Department of Pathology, Haartman Institute, University of Helsinki and HUSLAB
- 25 - Department of Neuropathology and Neurosurgery, Helsinki University Hospital and University of Helsinki, Helsinki, Finland
- 26 - Neurology Department, Mayo Clinic, Rochester, MN, USA
- 27 - Department of Psychiatry and Department of Psychology, Mayo Clinic, Jacksonville, FL, USA
- 28 - MRC Centre for Neuropsychiatric Genetics and Genomics, School of Medicine, Cardiff University, Cardiff, UK
- 29 - Department of Neurology, Mayo Clinic, Jacksonville, FL, USA
- 30 - Knight Alzheimer's Disease Research Center, Department of Neurology, Washington University School of Medicine, Saint Louis, MO, USA
- 31 - Genetics and Pharmacogenomics, Merck Research Laboratories, West Point, Pennsylvania, USA
- 32 - Institute of Brain, Behaviour and Mental Health, Faculty of Medical and Human Sciences, University of Manchester, Manchester, UK
- 33 - Department of Molecular Neuroscience, UCL Institute of Neurology, London, UK and Department of Medical Sciences and Institute of Biomedicine – iBiMED, University of Aveiro, 3810-193 Aveiro, Portugal

**Supplementary Table 1.** Origin of the DLB samples included in the studied cohort

| <b>Cohort</b>                                  | <b><i>N</i></b> | <b>Neuropathological diagnosis</b> | <b>DNA origin</b> |
|------------------------------------------------|-----------------|------------------------------------|-------------------|
| University of New South Wales, Australia       | 78              | Yes                                | Brain tissue      |
| Helsinki University Hospital, Finland          | 29              | Yes                                | Brain tissue      |
| Université Pierre et Marie Curie-Paris, France | 15              | Yes                                | Brain tissue      |
| Netherlands Brain Bank, The Netherlands        | 132             | Yes                                | Brain tissue      |
| Hospital de la Santa Creu i Sant Pau, Spain    | 54              | No                                 | Blood             |
| Bellvitge University Hospital, Spain           | 16              | Yes                                | Brain tissue      |
| South West Dementia Brain Bank, UK             | 50              | Yes                                | Brain tissue      |
| King's College London, UK                      | 80              | Yes                                | Brain tissue      |
| University of Manchester, UK                   | 72              | No                                 | Blood             |
| Manchester Brain Bank, UK                      | 48              | Yes                                | Brain tissue      |
| Newcastle University, UK                       | 18              | Yes                                | Brain tissue      |
| Oxford University, UK                          | 69              | Yes                                | Brain tissue      |
| Queen Square Brain Bank, UK                    | 23              | Yes                                | Brain tissue      |
| Mayo Clinic, Florida, USA                      | 467             | Yes                                | Brain tissue      |
| Columbia University, USA                       | 80              | Yes                                | Brain tissue      |
| University of San Diego California, USA        | 41              | Yes                                | Brain tissue      |
| University of Pennsylvania, USA                | 14              | Yes                                | Brain tissue      |
| Washington University St Louis, USA            | 144             | Yes                                | Brain tissue      |
| <b>Total</b>                                   | <b>1430</b>     |                                    |                   |

The vast majority of samples studied had a neuropathological diagnosis of DLB (n=1304). *N*: number of samples included.

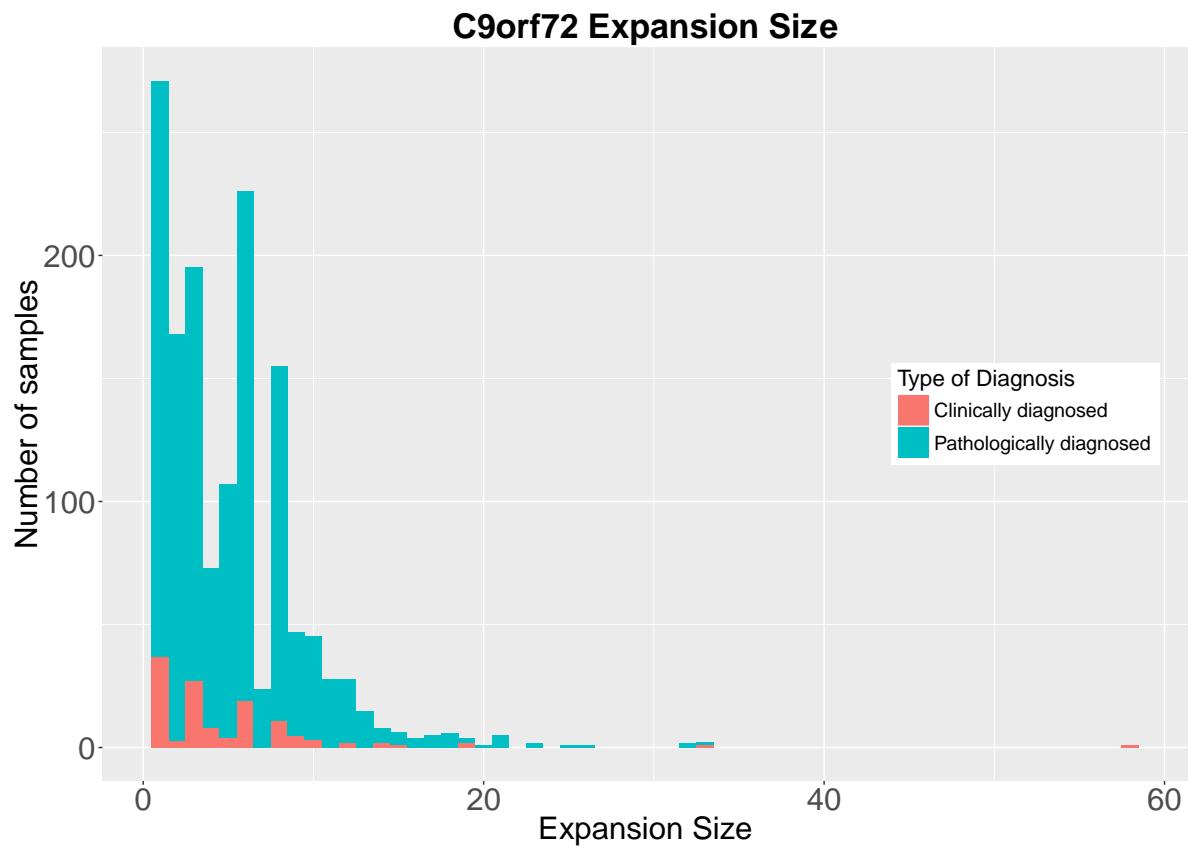

**Supplementary Fig. 1.** *C9orf72* repeat expansion sizes distribution in the studied cohort of DLB cases. Red bars represent clinically diagnosed DLB cases (n=126) and blue bars represent neuropathologically defined cases (n=1304). Only one clinically diagnosed sample was found to have a potentially pathogenic expansion (58 repeats).

## References

- Beck, J., Poulter, M., Hensman, D., Rohrer, J.D., Mahoney, C.J., Adamson, G., Campbell, T., Uphill, J., Borg, A., Fratta, P., Orrell, R.W., Malaspina, A., Rowe, J., Brown, J., Hodges, J., Sidle, K., Polke, J.M., Houlden, H., Schott, J.M., Fox, N.C., Rossor, M.N., Tabrizi, S.J., Isaacs, A.M., Hardy, J., Warren, J.D., Collinge, J., & Mead, S. (2013). Large C9orf72 hexanucleotide repeat expansions are seen in multiple neurodegenerative syndromes and are more frequent than expected in the UK population. *Am J Hum Genet*, *92*(3), 345-353. doi: 10.1016/j.ajhg.2013.01.011.
- Boeve, B.F., Boylan, K.B., Graff-Radford, N.R., DeJesus-Hernandez, M., Knopman, D.S., Pedraza, O., Vemuri, P., Jones, D., Lowe, V., Murray, M.E., Dickson, D.W., Josephs, K.A., Rush, B.K., Machulda, M.M., Fields, J.A., Ferman, T.J., Baker, M., Rutherford, N.J., Adamson, J., Wszolek, Z.K., Adeli, A., Savica, R., Boot, B., Kuntz, K.M., Gavrilo, R., Reeves, A., Whitwell, J., Kantarci, K., Jack, C.R., Jr., Parisi, J.E., Lucas, J.A., Petersen, R.C., & Rademakers, R. (2012). Characterization of frontotemporal dementia and/or amyotrophic lateral sclerosis associated with the GGGGCC repeat expansion in C9ORF72. *Brain*, *135*(Pt 3), 765-783. doi: 10.1093/brain/aws004.
- Bras, J., Guerreiro, R., Darwent, L., Parkkinen, L., Ansorge, O., Escott-Price, V., Hernandez, D.G., Nalls, M.A., Clark, L.N., Honig, L.S., Marder, K., Van Der Flier, W.M., Lemstra, A., Scheltens, P., Rogaeva, E., St George-Hyslop, P., Londos, E., Zetterberg, H., Ortega-Cubero, S., Pastor, P., Ferman, T.J., Graff-Radford, N.R., Ross, O.A., Barber, I., Braae, A., Brown, K., Morgan, K., Maetzler, W., Berg, D., Troakes, C., Al-Sarraj, S., Lashley, T., Compta, Y., Revesz, T., Lees, A., Cairns, N., Halliday, G.M., Mann, D., Pickering-Brown, S., Dickson, D.W., Singleton, A., & Hardy, J. (2014). Genetic analysis implicates APOE, SNCA and suggests lysosomal dysfunction in the etiology of dementia with Lewy bodies. *Hum Mol Genet*, *23*(23), 6139-6146. doi: 10.1093/hmg/ddu334.
- Claassen, D.O., Parisi, J.E., Giannini, C., Boeve, B.F., Dickson, D.W., & Josephs, K.A. (2008). Frontotemporal dementia mimicking dementia with Lewy bodies. *Cogn Behav Neurol*, *21*(3), 157-163. doi: 10.1097/WNN.0b013e3181864a09.
- DeJesus-Hernandez, M., Mackenzie, I.R., Boeve, B.F., Boxer, A.L., Baker, M., Rutherford, N.J., Nicholson, A.M., Finch, N.A., Flynn, H., Adamson, J., Kouri, N., Wojtas, A., Sengdy, P., Hsiung, G.Y., Karydas, A., Seeley, W.W., Josephs, K.A., Coppola, G., Geschwind, D.H., Wszolek, Z.K., Feldman, H., Knopman, D.S., Petersen, R.C., Miller, B.L., Dickson, D.W., Boylan, K.B., Graff-Radford, N.R., & Rademakers, R. (2011). Expanded GGGGCC hexanucleotide repeat in noncoding region of C9ORF72 causes chromosome 9p-linked FTD and ALS. *Neuron*, *72*(2), 245-256. doi: 10.1016/j.neuron.2011.09.011.
- Geiger, J.T., Arthur, K.C., Dawson, T.M., Rosenthal, L.S., Pantelyat, A., Albert, M., Hillis, A.E., Crain, B., Pletnikova, O., Troncoso, J.C., & Scholz, S.W. (2016). C9orf72 Hexanucleotide Repeat Analysis in Cases with Pathologically Confirmed Dementia with Lewy Bodies. *Neurodegener Dis*, *16*(5-6), 370-372. doi: 10.1159/000445872.
- Guerreiro, R., Escott-Price, V., Darwent, L., Parkkinen, L., Ansorge, O., Hernandez, D.G., Nalls, M.A., Clark, L., Honig, L., Marder, K., van der Flier, W., Holstege, H., Louwersheimer, E., Lemstra, A., Scheltens, P., Rogaeva, E., St George-Hyslop, P., Londos, E., Zetterberg, H., Ortega-Cubero, S., Pastor, P., Ferman, T.J., Graff-Radford, N.R., Ross, O.A., Barber, I., Braae, A., Brown, K., Morgan, K., Maetzler, W., Berg, D., Troakes, C., Al-Sarraj, S., Lashley, T., Compta, Y., Revesz, T., Lees, A., Cairns, N.J., Halliday, G.M., Mann, D., Pickering-Brown, S., Powell, J., Lunnon, K., Lupton, M.K., International Parkinson's Disease Genomics, C., Dickson, D., Hardy, J., Singleton, A., & Bras, J. (2016). Genome-wide analysis of genetic correlation in dementia with Lewy bodies, Parkinson's and Alzheimer's diseases. *Neurobiol Aging*, *38*, 214 e217-214 e210. doi: 10.1016/j.neurobiolaging.2015.10.028.
- Guerreiro, R., Kun-Rodrigues, C., Darwent, L., Orme, T., Parkkinen, L., Ansorge, O., Clark, L., Honig, L., Marder, K., van der Flier, W., Lemstra, A., Scheltens, P., Rogaeva, E., St George-Hyslop, P.,

- Londos, E., Zetterberg, H., Ortega-Cubero, S., Pastor, P., Barber, I., Braae, A., Brown, K., Morgan, K., Maetzler, W., Berg, D., Troakes, C., Al-Sarraj, S., Lashley, T., Compta, Y., Van Deerlin, V.M., Trojanowski, J.Q., Clarimon, J., Lesage, S., Galasko, D., Masliah, E., Tienari, P.J., Revesz, T., Lees, A., Ferman, T.J., Graff-Radford, N.R., Ross, O.A., Dickson, D., Escott-Price, V., Cairns, N., Halliday, G., Mann, D., Pickering-Brown, S., Singleton, A., Hardy, J., & Bras, J. (2015). C9ORF72 in a Large International Cohort of Neuropathologically diagnosed Dementia with Lewy Bodies Cases. *Am J Neurodegener Dis*, 4(Suppl 1), 1-178.
- Harms, M., Benitez, B.A., Cairns, N., Cooper, B., Cooper, P., Mayo, K., Carrell, D., Faber, K., Williamson, J., Bird, T., Diaz-Arrastia, R., Foroud, T.M., Boeve, B.F., Graff-Radford, N.R., Mayeux, R., Chakraverty, S., Goate, A.M., Cruchaga, C., & Consortium, N.-L.N.F.S. (2013). C9orf72 hexanucleotide repeat expansions in clinical Alzheimer disease. *JAMA Neurol*, 70(6), 736-741. doi: 10.1001/2013.jamaneurol.537.
- Heidebrink, J.L. (2002). Is dementia with Lewy bodies the second most common cause of dementia? *J Geriatr Psychiatry Neurol*, 15(4), 182-187.
- Hensman Moss, D.J., Poulter, M., Beck, J., Hehir, J., Polke, J.M., Campbell, T., Adamson, G., Mudanohwo, E., McColgan, P., Haworth, A., Wild, E.J., Sweeney, M.G., Houlden, H., Mead, S., & Tabrizi, S.J. (2014). C9orf72 expansions are the most common genetic cause of Huntington disease phenocopies. *Neurology*, 82(4), 292-299. doi: 10.1212/WNL.000000000000061.
- Keogh, M.J., Kurzawa-Akanbi, M., Griffin, H., Douroudis, K., Ayers, K.L., Hussein, R.I., Hudson, G., Pyle, A., Cordell, H.J., Attems, J., McKeith, I.G., O'Brien, J.T., Burn, D.J., Morris, C.M., Thomas, A.J., & Chinnery, P.F. (2016). Exome sequencing in dementia with Lewy bodies. *Transl Psychiatry*, 6, e728. doi: 10.1038/tp.2015.220.
- Kohli, M.A., John-Williams, K., Rajbhandary, R., Naj, A., Whitehead, P., Hamilton, K., Carney, R.M., Wright, C., Crocco, E., Gwirtzman, H.E., Lang, R., Beecham, G., Martin, E.R., Gilbert, J., Benatar, M., Small, G.W., Mash, D., Byrd, G., Haines, J.L., Pericak-Vance, M.A., & Zuchner, S. (2013). Repeat expansions in the C9ORF72 gene contribute to Alzheimer's disease in Caucasians. *Neurobiol Aging*, 34(5), 1519 e1515-1512. doi: 10.1016/j.neurobiolaging.2012.10.003.
- Majounie, E., Abramzon, Y., Renton, A.E., Keller, M.F., Traynor, B.J., & Singleton, A.B. (2012a). Large C9orf72 repeat expansions are not a common cause of Parkinson's disease. *Neurobiol Aging*, 33(10), 2527 e2521-2522. doi: 10.1016/j.neurobiolaging.2012.05.007.
- Majounie, E., Abramzon, Y., Renton, A.E., Perry, R., Bassett, S.S., Pletnikova, O., Troncoso, J.C., Hardy, J., Singleton, A.B., & Traynor, B.J. (2012b). Repeat expansion in C9ORF72 in Alzheimer's disease. *N Engl J Med*, 366(3), 283-284. doi: 10.1056/NEJMc1113592.
- Majounie, E., Renton, A.E., Mok, K., Dopper, E.G., Waite, A., Rollinson, S., Chio, A., Restagno, G., Nicolaou, N., Simon-Sanchez, J., van Swieten, J.C., Abramzon, Y., Johnson, J.O., Sendtner, M., Pampillet, R., Orrell, R.W., Mead, S., Sidle, K.C., Houlden, H., Rohrer, J.D., Morrison, K.E., Pall, H., Talbot, K., Ansorge, O., Chromosome, A.L.S.F.T.D.C., French research network on, F.F.A., Consortium, I., Hernandez, D.G., Arepalli, S., Sabatelli, M., Mora, G., Corbo, M., Giannini, F., Calvo, A., Englund, E., Borghero, G., Floris, G.L., Remes, A.M., Laaksovirta, H., McCluskey, L., Trojanowski, J.Q., Van Deerlin, V.M., Schellenberg, G.D., Nalls, M.A., Drory, V.E., Lu, C.S., Yeh, T.H., Ishiura, H., Takahashi, Y., Tsuji, S., Le Ber, I., Brice, A., Drepper, C., Williams, N., Kirby, J., Shaw, P., Hardy, J., Tienari, P.J., Heutink, P., Morris, H.R., Pickering-Brown, S., & Traynor, B.J. (2012c). Frequency of the C9orf72 hexanucleotide repeat expansion in patients with amyotrophic lateral sclerosis and frontotemporal dementia: a cross-sectional study. *Lancet Neurol*, 11(4), 323-330. doi: 10.1016/S1474-4422(12)70043-1.
- McKeith, I.G., Dickson, D.W., Lowe, J., Emre, M., O'Brien, J.T., Feldman, H., Cummings, J., Duda, J.E., Lippa, C., Perry, E.K., Aarsland, D., Arai, H., Ballard, C.G., Boeve, B., Burn, D.J., Costa, D., Del Ser, T., Dubois, B., Galasko, D., Gauthier, S., Goetz, C.G., Gomez-Tortosa, E., Halliday, G., Hansen, L.A., Hardy, J., Iwatsubo, T., Kalaria, R.N., Kaufer, D., Kenny, R.A., Korszyn, A.,

- Kosaka, K., Lee, V.M., Lees, A., Litvan, I., Londos, E., Lopez, O.L., Minoshima, S., Mizuno, Y., Molina, J.A., Mukaetova-Ladinska, E.B., Pasquier, F., Perry, R.H., Schulz, J.B., Trojanowski, J.Q., Yamada, M., & Consortium on, D.L.B. (2005). Diagnosis and management of dementia with Lewy bodies: third report of the DLB Consortium. *Neurology*, *65*(12), 1863-1872. doi: 10.1212/01.wnl.0000187889.17253.b1.
- Meeus, B., Verstraeten, A., Crosiers, D., Engelborghs, S., Van den Broeck, M., Mattheijssens, M., Peeters, K., Corsmit, E., Elinck, E., Pickut, B., Vandenbergh, R., Cras, P., De Deyn, P.P., Van Broeckhoven, C., & Theuns, J. (2012). DLB and PDD: a role for mutations in dementia and Parkinson disease genes? *Neurobiol Aging*, *33*(3), 629 e625-629 e618. doi: 10.1016/j.neurobiolaging.2011.10.014.
- Renton, A.E., Majounie, E., Waite, A., Simon-Sanchez, J., Rollinson, S., Gibbs, J.R., Schymick, J.C., Laaksovirta, H., van Swieten, J.C., Myllykangas, L., Kalimo, H., Paetau, A., Abramzon, Y., Remes, A.M., Kaganovich, A., Scholz, S.W., Duckworth, J., Ding, J., Harmer, D.W., Hernandez, D.G., Johnson, J.O., Mok, K., Ryten, M., Trabzuni, D., Guerreiro, R.J., Orrell, R.W., Neal, J., Murray, A., Pearson, J., Jansen, I.E., Sondervan, D., Seelaar, H., Blake, D., Young, K., Halliwell, N., Callister, J.B., Toulson, G., Richardson, A., Gerhard, A., Snowden, J., Mann, D., Neary, D., Nalls, M.A., Peuralinna, T., Jansson, L., Isoviita, V.M., Kaivorinne, A.L., Holtta-Vuori, M., Ikonen, E., Sulkava, R., Benatar, M., Wu, J., Chio, A., Restagno, G., Borghero, G., Sabatelli, M., Consortium, I., Heckerman, D., Rogava, E., Zinman, L., Rothstein, J.D., Sendtner, M., Drepper, C., Eichler, E.E., Alkan, C., Abdullaev, Z., Pack, S.D., Dutra, A., Pak, E., Hardy, J., Singleton, A., Williams, N.M., Heutink, P., Pickering-Brown, S., Morris, H.R., Tienari, P.J., & Traynor, B.J. (2011). A hexanucleotide repeat expansion in C9ORF72 is the cause of chromosome 9p21-linked ALS-FTD. *Neuron*, *72*(2), 257-268. doi: 10.1016/j.neuron.2011.09.010.
- Robinson, A., Davidson, Y., Snowden, J.S., & Mann, D.M. (2014). C9ORF72 in dementia with Lewy bodies. *J Neurol Neurosurg Psychiatry*, *85*(12), 1435-1436. doi: 10.1136/jnnp-2014-307622.
- Rollinson, S., Halliwell, N., Young, K., Callister, J.B., Toulson, G., Gibbons, L., Davidson, Y.S., Robinson, A.C., Gerhard, A., Richardson, A., Neary, D., Snowden, J., Mann, D.M., & Pickering-Brown, S.M. (2012). Analysis of the hexanucleotide repeat in C9ORF72 in Alzheimer's disease. *Neurobiol Aging*, *33*(8), 1846 e1845-1846. doi: 10.1016/j.neurobiolaging.2012.01.109.
- Simon-Sanchez, J., Dopper, E.G., Cohn-Hokke, P.E., Hukema, R.K., Nicolaou, N., Seelaar, H., de Graaf, J.R., de Koning, I., van Schoor, N.M., Deeg, D.J., Smits, M., Raaphorst, J., van den Berg, L.H., Schelhaas, H.J., De Die-Smulders, C.E., Majoor-Krakauer, D., Rozemuller, A.J., Willemsen, R., Pijnenburg, Y.A., Heutink, P., & van Swieten, J.C. (2012). The clinical and pathological phenotype of C9ORF72 hexanucleotide repeat expansions. *Brain*, *135*(Pt 3), 723-735. doi: 10.1093/brain/awr353.
- Snowden, J.S., Rollinson, S., Lafon, C., Harris, J., Thompson, J., Richardson, A.M., Jones, M., Gerhard, A., Neary, D., Mann, D.M., & Pickering-Brown, S. (2012). Psychosis, C9ORF72 and dementia with Lewy bodies. *J Neurol Neurosurg Psychiatry*, *83*(10), 1031-1032. doi: 10.1136/jnnp-2012-303032.
- van der Zee, J., Gijssels, I., Dillen, L., Van Langenhove, T., Theuns, J., Engelborghs, S., Philtjens, S., Vandenbulcke, M., Sleegers, K., Sieben, A., Baumer, V., Maes, G., Corsmit, E., Borroni, B., Padovani, A., Archetti, S., Pernecky, R., Diehl-Schmid, J., de Mendonca, A., Miltenberger-Miltenyi, G., Pereira, S., Pimentel, J., Nacmias, B., Bagnoli, S., Sorbi, S., Graff, C., Chiang, H.H., Westerlund, M., Sanchez-Valle, R., Llado, A., Gelpi, E., Santana, I., Almeida, M.R., Santiago, B., Frisoni, G., Zanetti, O., Bonvicini, C., Synofzik, M., Maetzler, W., Vom Hagen, J.M., Schols, L., Heneka, M.T., Jessen, F., Matej, R., Parobkova, E., Kovacs, G.G., Strobel, T., Sarafov, S., Tournay, I., Jordanova, A., Danek, A., Arzberger, T., Fabrizi, G.M., Testi, S., Salmon, E., Santens, P., Martin, J.J., Cras, P., Vandenbergh, R., De Deyn, P.P., Cruts, M., Van Broeckhoven, C., van der Zee, J., Gijssels, I., Dillen, L., Van Langenhove, T., Theuns, J., Philtjens, S., Sleegers, K., Baumer, V., Maes, G., Corsmit, E., Cruts, M., Van Broeckhoven, C.,

- van der Zee, J., Gijssels, I., Dillen, L., Van Langenhove, T., Philtjens, S., Theuns, J., Sleegers, K., Baumer, V., Maes, G., Cruts, M., Van Broeckhoven, C., Engelborghs, S., De Deyn, P.P., Cras, P., Engelborghs, S., De Deyn, P.P., Vandenbulcke, M., Vandenbulcke, M., Borroni, B., Padovani, A., Archetti, S., Pernecky, R., Diehl-Schmid, J., Synofzik, M., Maetzler, W., Muller Vom Hagen, J., Schols, L., Synofzik, M., Maetzler, W., Muller Vom Hagen, J., Schols, L., Heneka, M.T., Jessen, F., Ramirez, A., Kurzweil, D., Sachtleben, C., Mairer, W., de Mendonca, A., Miltenberger-Miltenyi, G., Pereira, S., Firmo, C., Pimentel, J., Sanchez-Valle, R., Llado, A., Antonell, A., Molinuevo, J., Gelpi, E., Graff, C., Chiang, H.H., Westerlund, M., Graff, C., Kinhult Stahlbom, A., Thonberg, H., Nennesmo, I., Borjesson-Hanson, A., Nacmias, B., Bagnoli, S., Sorbi, S., Bessi, V., Piaceri, I., Santana, I., Santiago, B., Santana, I., Helena Ribeiro, M., Rosario Almeida, M., Oliveira, C., Massano, J., Garret, C., Pires, P., Frisoni, G., Zanetti, O., Bonvicini, C., Sarafov, S., Tournev, I., Jordanova, A., Tournev, I., Kovacs, G.G., Strobel, T., Heneka, M.T., Jessen, F., Ramirez, A., Kurzweil, D., Sachtleben, C., Mairer, W., Jessen, F., Matej, R., Parobkova, E., Danel, A., Arzberger, T., Maria Fabrizi, G., Testi, S., Ferrari, S., Cavallaro, T., Salmon, E., Santens, P., Cras, P., & European Early-Onset Dementia, C. (2013). A pan-European study of the C9orf72 repeat associated with FTLN: geographic prevalence, genomic instability, and intermediate repeats. *Hum Mutat*, *34*(2), 363-373. doi: 10.1002/humu.22244.
- Weisman, D., & McKeith, I. (2007). Dementia with Lewy bodies. *Semin Neurol*, *27*(1), 42-47. doi: 10.1055/s-2006-956754.
- Xi, Z., Zhang, M., Bruni, A.C., Maletta, R.G., Colao, R., Fratta, P., Polke, J.M., Sweeney, M.G., Mudanohwo, E., Nacmias, B., Sorbi, S., Tartaglia, M.C., Rainero, I., Rubino, E., Pinessi, L., Galimberti, D., Surace, E.I., McGoldrick, P., McKeever, P., Moreno, D., Sato, C., Liang, Y., Keith, J., Zinman, L., Robertson, J., & Rogava, E. (2015). The C9orf72 repeat expansion itself is methylated in ALS and FTLN patients. *Acta Neuropathol*, *129*(5), 715-727. doi: 10.1007/s00401-015-1401-8.
- Yeh, T.H., Lai, S.C., Weng, Y.H., Kuo, H.C., Wu-Chou, Y.H., Huang, C.L., Chen, R.S., Chang, H.C., Traynor, B., & Lu, C.S. (2013). Screening for C9orf72 repeat expansions in parkinsonian syndromes. *Neurobiol Aging*, *34*(4), 1311 e1313-1314. doi: 10.1016/j.neurobiolaging.2012.09.002.
